# Supplementary material
Source: Springer Nature journal article supplement (https://www.springermedizin.de/resource/supplementary/13058_2010_2616_MOESM8_ESM.pdf/9702152)

(a)

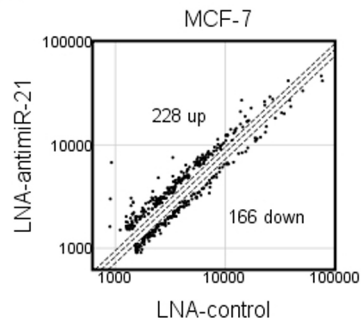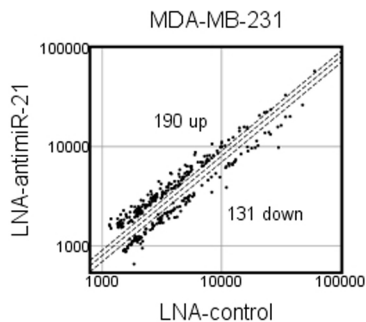

(b)

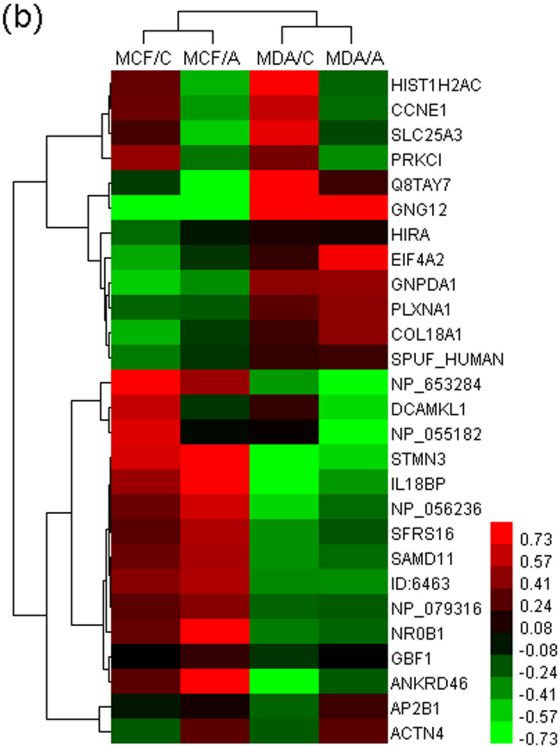

(c)

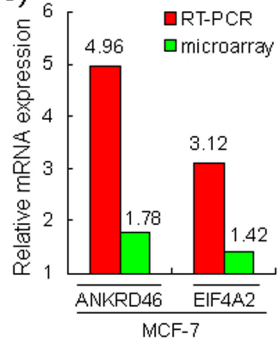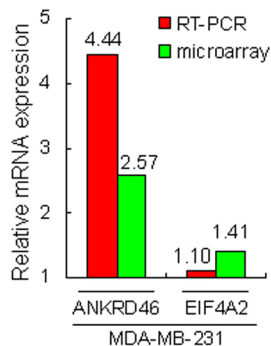

Supplement: MOESM8 [file 9702152]
